# Supplementary material for: Development, assessment and validation of a novel prediction nomogram model for risk identification of tracheobronchial tuberculosis in patients with pulmonary tuberculosis
Source: HighWire-hosted journal article supplement (doi:10.1136/bmjresp-2023-001781), 2023-11-01
Supplement: bmjresp-2023-001781supp003_data_supplement.pdf [file bmjresp-2023-001781supp003_data_supplement.pdf]

**Appendix 3: Prediction factors for associated TBTB in 1894 patients with PTB**

| Intercept and variable              | Prediction model |                         |                 |
|-------------------------------------|------------------|-------------------------|-----------------|
|                                     | $\beta$          | Odds ratio (95% CI)     | <i>p</i> -value |
| Intercept                           | -2.376           | 0.093 (0.062-0.137)     | < 0.001         |
| EPTB                                | -0.718           | 0.488 (0.308-0.754)     | 0.002           |
| Female                              | 0.765            | 2.148 (1.68-2.754)      | < 0.001         |
| Smoker                              | -0.593           | 0.553 (0.418-0.73)      | < 0.001         |
| Diabetes                            | -0.422           | 0.656 (0.419-1.012)     | 0.06            |
| Cough                               | 1.064            | 2.897 (2.157-3.919)     | < 0.001         |
| Sputum production                   | 0.65             | 1.916 (1.511-2.435)     | < 0.001         |
| Tachypnea                           | 0.346            | 1.414 (1.058-1.89)      | 0.019           |
| Chest pain                          | -0.415           | 0.66 (0.43-0.998)       | 0.052           |
| Pulmonary function test             |                  |                         |                 |
| Normal                              |                  | Reference               |                 |
| Abnormal                            | 0.234            | 1.263 (0.992-1.611)     | 0.059           |
| Atelectasis                         | 1.242            | 3.463 (1.925-6.427)     | < 0.001         |
| Number of previous hospitalizations |                  |                         |                 |
| 0                                   |                  | Reference               |                 |
| 1-2                                 | 0.884            | 2.42 (1.929-3.045)      | < 0.001         |
| 3-4                                 | 2.188            | 8.918 (4.631-18.478)    | < 0.001         |
| $\geq 5$                            | 3.973            | 53.162 (8.408-1120.401) | < 0.001         |

$\beta$  is the regression coefficient. Abbreviations: PTB, pulmonary tuberculosis; TBTB, tracheobronchial tuberculosis; EPTB, extrapulmonary tuberculosis; CI, confidence interval.
