# Supplementary material for: Development, assessment and validation of a novel prediction nomogram model for risk identification of tracheobronchial tuberculosis in patients with pulmonary tuberculosis
Source: HighWire-hosted journal article supplement (doi:10.1136/bmjresp-2023-001781), 2023-11-01
Supplement: bmjresp-2023-001781supp004_data_supplement.pdf [file bmjresp-2023-001781supp004_data_supplement.pdf]

**Appendix 4: Scores of clinical variables in each subgroup**

| <b>Variable</b>   | <b>Points</b> | <b>Variable</b>                     | <b>Points</b> |
|-------------------|---------------|-------------------------------------|---------------|
| EPTB              |               | Tachypnea                           |               |
| No                | 18            | No                                  | 0             |
| Yes               | 0             | Yes                                 | 9             |
| Gender            |               | Chest pain                          |               |
| Male              | 0             | No                                  | 10            |
| Female            | 19            | Yes                                 | 0             |
| Smoker            |               | Pulmonary function test             |               |
| No                | 15            | Normal                              | 0             |
| Yes               | 0             | Abnormal                            | 6             |
| Diabetes          |               | Atelectasis                         |               |
| No                | 11            | No                                  | 0             |
| Yes               | 0             | Yes                                 | 31            |
| Cough             |               | Number of previous hospitalizations |               |
| No                | 0             | 0                                   | 0             |
| Yes               | 27            | 1-2                                 | 22            |
| Sputum production |               | 3-4                                 | 55            |
| No                | 0             | ≥ 5                                 | 100           |
| Yes               | 16            | Total scores                        | 280           |

Abbreviations: EPTB, extrapulmonary tuberculosis.
